# Supplementary material
Source: publisher figshare collection journal article supplement (https://karger.figshare.com/ndownloader/files/24089717)
Supplement: Supplementary file 1 [file 24089717]

**Search Strategy**

# A comprehensive, computerized research was performed on PubMed (National Library of Medicine, Bethesda, MD) published from the 1950s to 7 June 2019 using the keywords as hepatocellular carcinoma and tumor lysis syndrome to search relevant articles without language limitation.

# References

# 1. [Burney IA](https://www.ncbi.nlm.nih.gov/pubmed/?term=Burney%20IA%5BAuthor%5D&cauthor=true&cauthor_uid=9598857) . Acute tumor lysis syndrome after transcatheter chemoembolization of hepatocellular carcinoma. [South Med J.](https://www.ncbi.nlm.nih.gov/pubmed/9598857) 1998 May;91(5):467-70.

# 2. Lee CC, Wu YH, Chung SH, [Chen WJ](https://www.ncbi.nlm.nih.gov/pubmed/?term=Chen%20WJ%5BAuthor%5D&cauthor=true&cauthor_uid=16401719). Acute tumor lysis syndrome after thalidomide therapy in advanced hepatocellular carcinoma. Oncologist. 2006 Jan;11(1):87-8.

# 3. Sakamoto N, Monzawa S, Nagano H, Nishizaki H, Arai Y, Sugimura K. Acute tumor lysis syndrome caused by transcatheter oily chemoembolization in a patient with a large hepatocellular carcinoma. Cardiovasc Intervent Radiol. 2007 May-Jun;30(3):508-11.

# 4. Shiba H, Ishida Y, Wakiyama S, Sakamoto T, Misawa T, Yanaga K. Acute tumor lysis syndrome after transarterial chemoembolization for hepatocellular carcinoma. Cancer Sci. 2008 Jun;99:2104-5.

5. Huang WS, Yang CH. Sorafenib induced tumor lysis syndrome in an advanced hepatocellular carcinoma patient. World J Gastroenterol. 2009 Sep;15(35):4464-6.

6. Hsieh PM, Hung KC, Chen YS. Tumor lysis syndrome after transarterial chemoembolization of hepatocellular carcinoma: case reports and literature review. World J Gastroenterol. 2009 Oct;15(37):4726–28.

7. Abbass K, Dewani S, Markert R, Kaplon MK, Baumann MA. All that glitters: sorafenib. Intern Med. 2011;50(7):797.

8. Chao CT, Chiang CK. Rasburicase for huge hepatocellular carcinoma with tumor lysis syndrome: case report. Med Princ Pract. 2012 July;21:498-500.

9. Tsai WL, Liang PC, Chen CH. Tumor lysis syndrome after transarterial chemoembolization plus portal venous embolization for hepatocellular carcinoma. J Formos Med Assoc. 2012 Dec;111(12):724-5.

10. Katiman D, Manikam J, Goh KL, Abdullah BJ, Mahadeva S. Tumour lysis syndrome: a rare complication of trans-arterial chemo-embolisation with doxorubicin beads for hepatocellular carcinoma. J Gastrointest Cancer. 2012 Sep;43 Suppl 1:S187-90.

11. Kudo, C., Miura, M., Gamoh, M, Niitani T, Tamagawa H, Takahashi K, et al. Tumor lysis syndrome after treatment with sorafenib for hepatocellular carcinoma. Int Canc Conf J 2015 July;4:147.

12. Jiang RD, Jian WC, Jin N, Zhang ZL, Li T. Tumor lysis syndrome: a serious complication of transcatheter arterial chemoembolization for hepatocellular carcinoma. Am J Med. 2016 Sep;129(9):e173-6.

13. Imam SZ, Zahid MF, Maqbool MA. Sorafenib-induced tumor lysis syndrome in a patient with metastatic hepatocellular carcinoma. Hematol Oncol Stem Cell Ther. 2018 April. [Epub ahead of print]
